# Supplementary material for: Cirsilineol improves anesthesia/surgery-induced postoperative cognitive dysfunction through attenuating oxidative stress and modulating microglia M1/M2 polarization
Source: PeerJ. 2024 Nov 15;12:e18507. doi: 10.7717/peerj.18507 (PMC11572359; doi:10.7717/peerj.18507)
Supplement: Supplemental Information 2 [file peerj-12-18507-s002.xls]

## Sheet: Sheet1
ITEM TO CHECK	IMPORTANCE	CHECKLIST
EXPERIMENTAL DESIGN
Definition of experimental and control groups	E	P10 line205-206
Number within each group	E	P10 line205-206
Assay carried out by core lab or investigator's lab?	D	Not Applicable
Acknowledgement of authors' contributions	D	Not Applicable
SAMPLE
Description	E	P10-11 line205-211
Volume/mass of sample processed	D	Not Applicable
Microdissection or macrodissection	E	P10-11 line205-211
Processing procedure	E	P10-11 line205-211
If frozen - how and how quickly?	E	P10-11 line205-211
If fixed - with what, how quickly?	E	P10-11 line205-211
Sample storage conditions and duration (especially for FFPE samples)	E	P10-11 line205-211
NUCLEIC ACID EXTRACTION
Procedure and/or instrumentation	E	P10-11 line205-211
Name of kit and details of any modifications	E	P10-11 line205-211
Source of additional reagents used	D	Not Applicable
Details of DNase or RNAse treatment	E	P10-11 line205-211
Contamination assessment (DNA or RNA)	E	P10-11 line205-211
Nucleic acid quantification	E	P10-11 line205-211
Instrument and method	E	P10-11 line205-211
Purity (A260/A280)	D	Not Applicable
Yield	D	Not Applicable
RNA integrity method/instrument	E	P10-11 line205-211
RIN/RQI or Cq of 3' and 5' transcripts	E	P10-11 line205-211
Electrophoresis traces	D	Not Applicable
Inhibition testing (Cq dilutions, spike or other)	E	P10-11 line205-211
REVERSE TRANSCRIPTION
Complete reaction conditions	E	P10-11 line205-211
Amount of RNA and reaction volume	E	P10-11 line205-211
Priming oligonucleotide (if using GSP) and concentration	E	P10-11 line205-211
Reverse transcriptase and concentration	E	P10-11 line205-211
Temperature and time	E	P10-11 line205-211
Manufacturer of reagents and catalogue numbers	D	Not Applicable
Cqs with and without RT	D*	Not Applicable
Storage conditions of cDNA	D	Not Applicable
qPCR TARGET INFORMATION
If multiplex, efficiency and LOD of each assay.	E	P10-11 line205-211
Sequence accession number	E	P10-11 line205-211
Location of amplicon	D	Not Applicable
Amplicon length	E	P10-11 line205-211
In silico specificity screen (BLAST, etc)	E	P10-11 line205-211
Pseudogenes, retropseudogenes or other homologs?	D	Not Applicable
Sequence alignment	D	Not Applicable
Secondary structure analysis of amplicon	D	Not Applicable
Location of each primer by exon or intron (if applicable)	E	P10-11 line205-211
What splice variants are targeted?	E	P10-11 line205-211
qPCR OLIGONUCLEOTIDES
Primer sequences	E	P10-11 line205-211
RTPrimerDB Identification Number	D	Not Applicable
Probe sequences	D**	Not Applicable
Location and identity of any modifications	E	P10-11 line205-211
Manufacturer of oligonucleotides	D	Not Applicable
Purification method	D	Not Applicable
qPCR PROTOCOL
Complete reaction conditions	E	P10-11 line205-211
Reaction volume and amount of cDNA/DNA	E	P10-11 line205-211
Primer, (probe), Mg++ and dNTP concentrations	E	P10-11 line205-211
Polymerase identity and concentration	E	P10-11 line205-211
Buffer/kit identity and manufacturer	E	P10-11 line205-211
Exact chemical constitution of the buffer	D	Not Applicable
Additives (SYBR Green I, DMSO, etc.)	E	P10-11 line205-211
Manufacturer of plates/tubes and catalog number	D	Not Applicable
Complete thermocycling parameters	E	P10-11 line205-211
Reaction setup (manual/robotic)	D	Not Applicable
Manufacturer of qPCR instrument	E	P10-11 line205-211
qPCR VALIDATION
Evidence of optimisation (from gradients)	D	P10-11 line205-211
Specificity (gel, sequence, melt, or digest)	E	P10-11 line205-211
For SYBR Green I, Cq of the NTC	E	P10-11 line205-211
Standard curves with slope and y-intercept	E	P10-11 line205-211
PCR efficiency calculated from slope	E	P10-11 line205-211
Confidence interval for PCR efficiency or standard error	D	P10-11 line205-211
r2 of standard curve	E	P10-11 line205-211
Linear dynamic range	E	P10-11 line205-211
Cq variation at lower limit	E	P10-11 line205-211
Confidence intervals throughout range	D	P10-11 line205-211
Evidence for limit of detection	E	P10-11 line205-211
If multiplex, efficiency and LOD of each assay.	E	P10-11 line205-211
DATA ANALYSIS
qPCR analysis program (source, version)	E	P10-11 line205-211
Cq method determination	E	P10-11 line205-211
Outlier identification and disposition	E	P10-11 line205-211
Results of NTCs	E	P10-11 line205-211
Justification of number and choice of reference genes	E	P10-11 line205-211
Description of normalisation method	E	P10-11 line205-211
Number and concordance of biological replicates	D	P10-11 line205-211
Number and stage (RT or qPCR) of technical replicates	E	P10-11 line205-211
Repeatability (intra-assay variation)	E	P10-11 line205-211
Reproducibility (inter-assay variation, %CV)	D	Not Applicable
Power analysis	D	Not Applicable
Statistical methods for result significance	E	P10-11 line205-211
Software (source, version)	E	P10-11 line205-211
Cq or raw data submission using RDML	D	P10-11 line205-211
Table 1. MIQE checklist for authors, reviewers and editors. All essential information (E) must be submitted with the manuscript. Desirable
information (D) should be submitted if available. If using primers obtained from RTPrimerDB, information on qPCR target, oligonucleotides,
protocols and validation is available from that source.
*: Assessing the absence of DNA using a no RT assay is essential when first extracting RNA. Once the sample has been validated as
RDNA-free, inclusion of a no-RT control is desirable, but no longer essential.
**: Disclosure of the probe sequence is highly desirable and strongly encouraged. However, since not all commercial pre-designed assay
vendors provide this information, it cannot be an essential requirement. Use of such assays is advised against.
